## Population Volume Kinetics in Volunteers: Reply: Retraction

The correspondence published Online First on February 20, 2020, “Population Volume Kinetics in Volunteers: Reply”<sup>1</sup> has been retracted because the original article being discussed, “Population Kinetics of 0.9% Saline Distribution in Hemorrhaged Awake and Isoflurane-anesthetized Volunteers,”<sup>2</sup> has been retracted at the request of the authors.

DOI: 10.1097/ALN.0000000000003404

## References

1. Nyberg J, Kinsky MP, Svensen CH: Population volume kinetics in volunteers: Reply. *ANESTHESIOLOGY* 2020 Feb 20. doi: 10.1097/ALN.0000000000003211 [Epub ahead of print]
2. Nyberg J, Li H, Wessmark P, Winther V, Prough DS, Kinsky MP, Svensén CH. Population kinetics of 0.9% saline distribution in hemorrhaged awake and isoflurane-anesthetized volunteers. *ANESTHESIOLOGY* 2019; 131:501–11. doi: 10.1097/ALN.0000000000002816

## Population Volume Kinetics in Volunteers: Comment: Retraction

The correspondence published Online First on February 20, 2020, “Population Volume Kinetics in Volunteers: Comment”<sup>1</sup> has been retracted because the original article being discussed, “Population Kinetics of 0.9% Saline Distribution in Hemorrhaged Awake and Isoflurane-anesthetized Volunteers,”<sup>2</sup> has been retracted at the request of the authors.

DOI: 10.1097/ALN.0000000000003405

## References

1. Hahn RG: Population volume kinetics in volunteers: Comment. *ANESTHESIOLOGY* 2020 Feb 20. doi: 10.1097/ALN.0000000000003210 [Epub ahead of print]
2. Nyberg J, Li H, Wessmark P, Winther V, Prough DS, Kinsky MP, Svensén CH. Population kinetics of 0.9% saline distribution in hemorrhaged awake and isoflurane-anesthetized volunteers. *ANESTHESIOLOGY* 2019; 131:501–11. doi: 10.1097/ALN.0000000000002816
